# Supplementary material
Source: PubMed Central journal article supplement (PMC3557496)
Supplement: NIHMS432719-supplement-Supplementary_File.pdf [file NIHMS432719-supplement-Supplementary_File.pdf]

Supplementary material for Vogelius I. R. et al., A literature-based meta-analysis of clinical risk factors for development of radiation induced pneumonitis. Acta Oncologica, 2012;51:975–983.

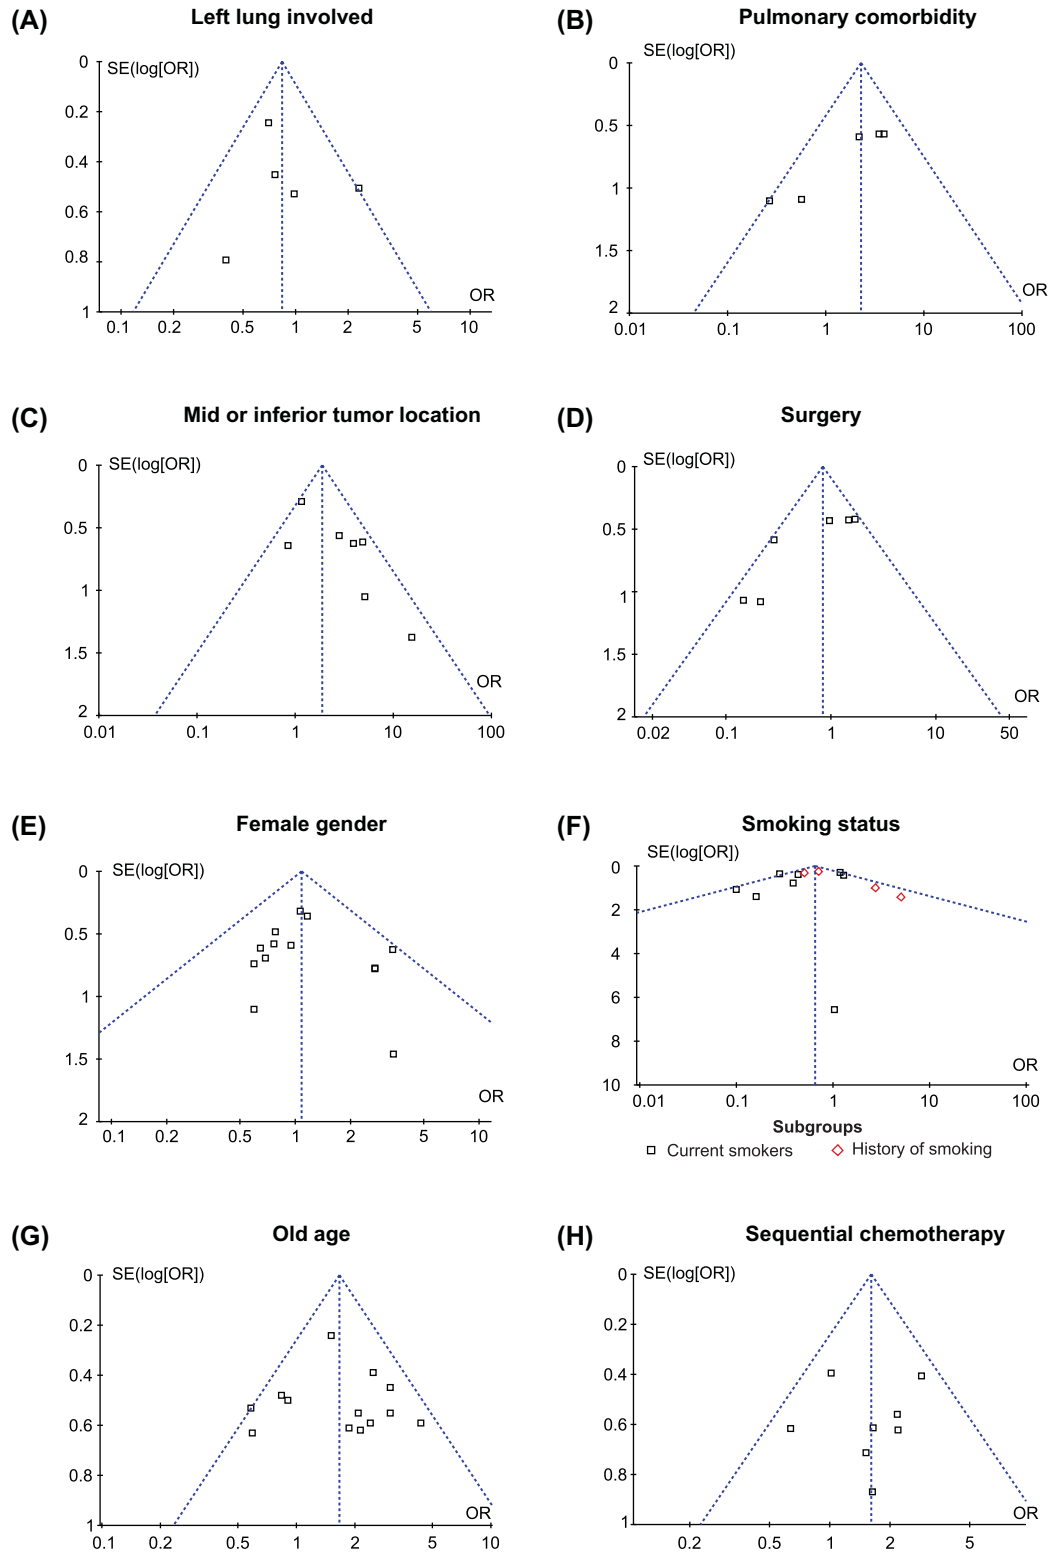

Supplementary Figure 1. Funnel plots corresponding to the pooled analysis in Figure 1.
